# Supplementary material
Source: publisher site journal article supplement (https://www.dovepress.com/article/125259)
Supplement: Supplementary file 1 [file get_supplementary_file.php]

| <b>Participating centers</b>                   | <b>Ethics committees</b>                                                                                                   |
|------------------------------------------------|----------------------------------------------------------------------------------------------------------------------------|
| Universitätsklinikum Aachen der RWTH           | Ethik-Kommission an der Medizinischen Fakultät der RWTH Aachen                                                             |
| Klinikum Altenburger Land GmbH                 | Ethik-Kommission der Landesärztekammer Thüringen                                                                           |
| Sozialstiftung Bamberg                         | Ethik-Kommission der Bayerischen Landesärztekammer                                                                         |
| Klinikum Bayreuth GmbH                         | Ethik-Kommission der Bayerischen Landesärztekammer                                                                         |
| Universitätsmed. Charite Campus Mitte          | Ethik-Kommission der Medizinischen Fakultät der Charité Universitätsmedizin Berlin                                         |
| Universitätsmed. Charite CBF                   | Ethik-Kommission der Medizinischen Fakultät der Charité Universitätsmedizin Berlin                                         |
| Klinikum Bielefeld                             | Ethik-Kommission der Ärztekammer Westfalen-Lippe und der Westfälischen Wilhelms-Universität Münster                        |
| Augusta-Kranken-Anstalt                        | Ethik-Kommission der Ärztekammer Westfalen-Lippe der Medizinischen Fakultät der Westfälischen Wilhelms-Universität Münster |
| Ev. Diakonie-Krankenhaus gGmbH                 | Ethik-Kommission des Landes Bremen                                                                                         |
| Klinikum Chemnitz gGmbH                        | Ethik-Kommission der Sächsischen Landeskammer                                                                              |
| St. Johannes Hospital Dortmund                 | Ethik-Kommission der Ärztekammer Nordrhein                                                                                 |
| Krankenhaus Dresden-Friedrichstadt             | Ethik-Kommission der Sächsischen Landeskammer                                                                              |
| Universitätsklinikum Carl Gustav Carus Dresden | Ethik-Kommission an der TU Dresden                                                                                         |
| Krankenhaus Düren gGmbH                        | Ethik-Kommission der Ärztekammer Nordrhein                                                                                 |
| Marienhospital Düsseldorf GmbH                 | Ethik-Kommission der Ärztekammer Nordrhein                                                                                 |
| HELIOS Klinikum Duisburg                       | Ethik-Kommission der Ärztekammer Nordrhein                                                                                 |
| Friedrich-Alexander-Universität                | Ethik-Kommission der Medizinischen Fakultät Friedrich-Alexander-Universität Erlangen-Nürnberg                              |
| Universitätsklinikum Essen                     | Ethik-Kommission der Medizinischen Fakultät der Universität Duisburg-Essen                                                 |
| Städtische Kliniken Esslingen                  | Ethik-Kommission bei der Landesärztekammer Baden-Württemberg                                                               |
| Klinikum Frankfurt (Oder) GmbH                 | Ethik-Kommission der Landesärztekammer Brandenburg                                                                         |
| Klinikum der J.W. Goethe Universität           | Ethik-Kommission des Fachbereichs Medizin der Johann Wolfgang Goethe-Universität Frankfurt                                 |
| Universitätsklinikum Freiburg                  | Ethik-Kommission der Albert-Ludwigs-Universität Freiburg                                                                   |
| Klinikum Fulda                                 | Ethik-Kommission für die Landesärztekammer Hessen                                                                          |
| Universitätsklinikum Halle (Saale)             | Ethik-Kommission der Medizinischen Fakultät der Martin-Luther-Universität Halle-Wittenberg                                 |
| Asklepios Klinik St. Georg                     | Ethik-Kommission der Ärztekammer Hamburg                                                                                   |

|                                            |                                                                                                                        |
|--------------------------------------------|------------------------------------------------------------------------------------------------------------------------|
| Sana Klinikum<br>Hameln-Pyrmont            | Ethik-Kommission bei der Ärztekammer Niedersachsen                                                                     |
| Evangelisches<br>Krankenhaus Hamm          | Ethik-Kommission der Ärztekammer Nordrhein                                                                             |
| Universitätsklinikum<br>Heidelberg         | Ethik-Kommission I der Medizinischen Fakultät Heidelberg                                                               |
| Universitätsklinikum<br>Jena               | Ethik-Kommission der Friedrich-Schiller-Universität Jena<br>an der Medizinischen Fakultät                              |
| St. Bernward<br>Krankenhaus                | Ethik-Kommission bei der Ärztekammer Niedersachsen                                                                     |
| Westpfalz-Klinikum<br>GmbH                 | Ethik-Kommission bei der Landesärztekammer Rheinland-<br>Pfalz                                                         |
| Städtische Kliniken<br>Kassel              | Ethik-Kommission für die Landesärztekammer Hessen                                                                      |
| Städtisches<br>Krankenhaus Kiel            | Ethik-Kommission bei der Landesärztekammer Schleswig-<br>Holstein                                                      |
| Gemeinschaftsklinikum<br>Mittelrhein gGmbH | Ethik-Kommission bei der Landesärztekammer Rheinland-<br>Pfalz                                                         |
| Städt. Klinikum St.<br>Georg               | Ethik-Kommission der Sächsischen Landeskammer                                                                          |
| St. Vincent<br>Krankenhaus                 | Ethik-Kommission für die Landesärztekammer Hessen                                                                      |
| Sana Kliniken Lübeck<br>GmbH               | Ethik-Kommission bei der Landesärztekammer Schleswig-<br>Holstein                                                      |
| Universitätsklinikum<br>Lübeck             | Ethik-Kommission der Universität zu Lübeck                                                                             |
| Universitätsklinikum<br>Marburg GmbH       | Kommission für Ethik in der ärztlichen Forschung des<br>Fachbereiches Humanmedizin der Philipps-Universität<br>Marburg |
| Carl-von-Basedow-<br>Klinikum Merseburg    | Ethik-Kommission der Ärztekammer Sachsen-Anhalt                                                                        |
| Johannes Wesling<br>Klinikum Minden        | Ethik-Kommission der Ärztekammer Nordrhein                                                                             |
| Kliniken Maria Hilf<br>GmbH                | Ethik-Kommission der Ärztekammer Nordrhein                                                                             |
| Krankenhaus<br>München-Harlaching          | Ethik-Kommission der Bayerischen Landesärztekammer                                                                     |
| Universitätsklinikum<br>Münster            | Ethik-Kommission der Ärztekammer Westfalen-Lippe und<br>der Westfälischen Wilhelms-Universität Münster                 |
| Städtisches Klinikum<br>Nord               | Ethik-Kommission der Bayerischen Landesärztekammer                                                                     |
| Klinikum Offenburg                         | Ethik-Kommission der Landesärztekammer Baden-<br>Württemberg                                                           |
| Klinikum der<br>Universität<br>Regensburg  | Ethik-Kommission an der Universität Regensburg                                                                         |
| Elblandklinikum Riesa                      | Ethik-Kommission der Sächsischen Landeskammer                                                                          |
| Diakoniekrankenhaus                        | Ethik-Kommission bei der Ärztekammer Niedersachsen                                                                     |
| Diakonie-Krankenhaus                       | Ethik-Kommission der Landesärztekammer Baden-<br>Württemberg                                                           |
| Leopoldina<br>Krankenhaus                  | Ethik-Kommission der Bayerischen Landesärztekammer                                                                     |

|                                                 |                                                                      |
|-------------------------------------------------|----------------------------------------------------------------------|
| Klinikum Sindelfingen-Böblingen                 | Ethik-Kommission der Landesärztekammer Baden-Württemberg             |
| Robert-Bosch-Krankenhaus                        | Ethik-Kommission der Landesärztekammer Baden-Württemberg             |
| Krankenanstalt Mutterhaus der Borromäerinnen    | Ethik-Kommission bei der Landesärztekammer Rheinland-Pfalz           |
| Rems-Murr-Klinikum Winnenden                    | Ethik-Kommission der Landesärztekammer Baden-Württemberg             |
| HELIOS Dr. Horst Schmidt Kliniken Wiesbaden     | Ethik-Kommission für die Landesärztekammer Hessen                    |
| Kliniken St. Antonius gGmbH, Petrus Krankenhaus | Ethik-Kommission der Ärztekammer Nordrhein                           |
| Universitätsklinikum Würzburg                   | Ethik-Kommission der Medizinischen Fakultät der Universität Würzburg |
